# Supplementary material for: Urinary enterolignans and enterolignan-predicting microbial species are favourably associated with liver fat and other obesity markers
Source: Royal Society of Chemistry journal article supplement (doi:10.1039/d3fo05632e), 2024-01-01
Supplement: d3fo05632e1.pdf [file d3fo05632e1.pdf]

## Supplementary Materials

**Supplementary Figure 1 The study design of the Anhui Lifestyle Validation Study**

**Supplementary Figure 2 Flowchart of the participants selection in the analysis.**

**Supplementary Table 1 The characteristics of participants according to urinary enterolignans concentration at baseline and after one-year of follow-up in Huoshan, China**

**Supplementary Table 2 One-year longitudinal repeated-measures associations between relative abundances of bacterial genera and urinary enterolactone among 485 participants in Huoshan, China**

**Supplementary Table 3 One-year longitudinal repeated-measures associations between relative abundances of bacterial genera and urinary enterodiol among 485 participants in Huoshan, China**

**Supplementary Table 4 Cross-sectional associations between urinary enterolignans and body fat measures at baseline and after 1-year among community-dwelling adults in Huoshan, China**

**Supplementary Table 5 Cross-sectional associations between enterolignan-predicting microbial score and body fat measures at baseline and after 1-year among community-dwelling adults in Huoshan, China**

Anhui Lifestyle Validation Study, ALVS (n=754)

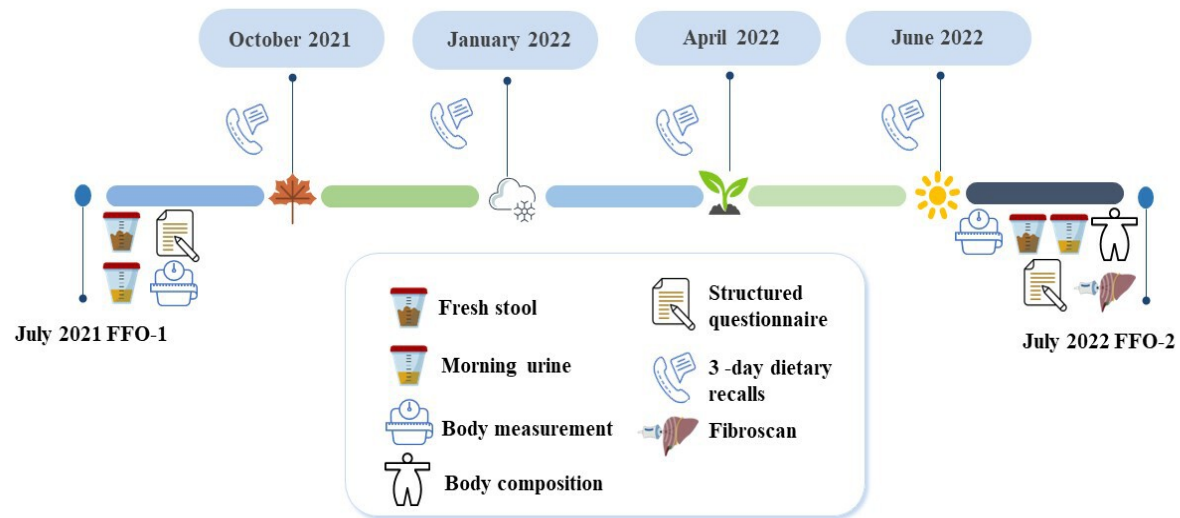

**Supplementary Figure 1** The study design of the Anhui Lifestyle Validation Study. FFQ, food frequency questionnaire.

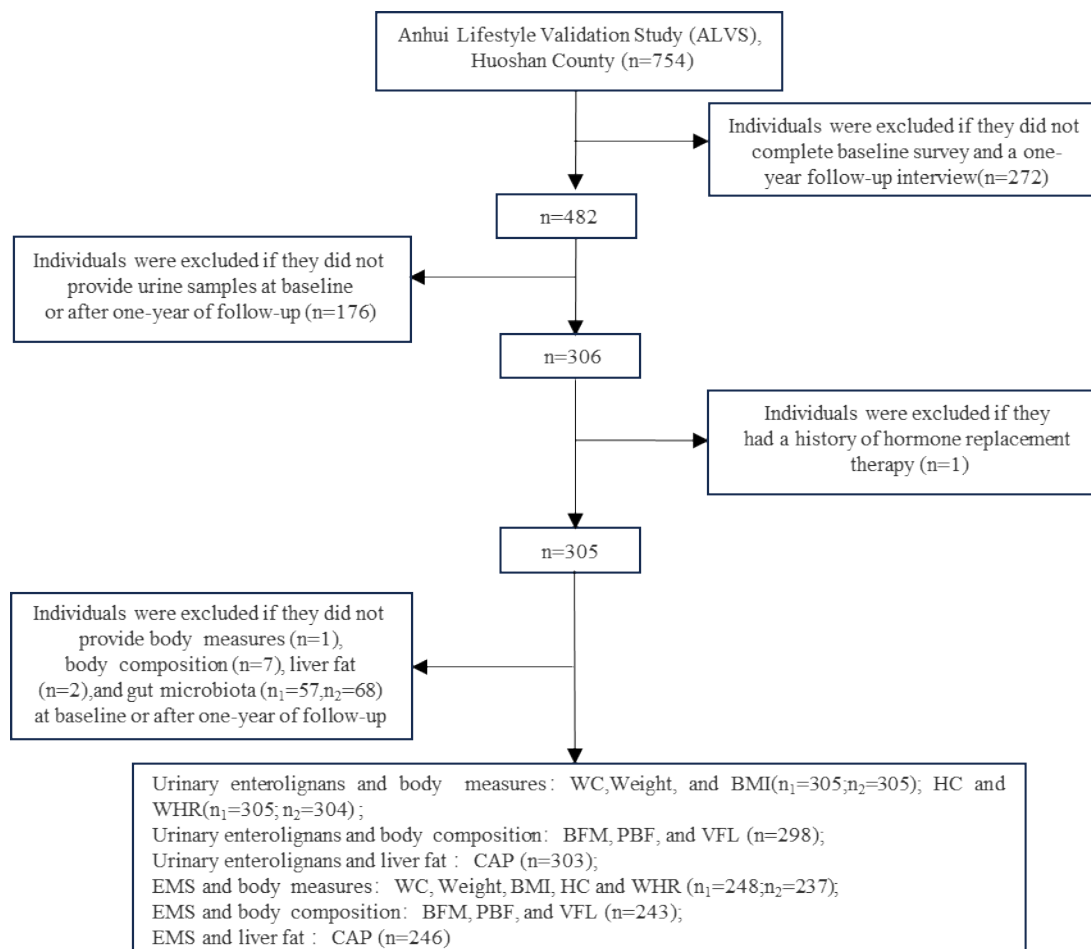

**Supplementary Figure 2** Flowchart of the participants selection in the analysis.

$n_1$ , sample size at baseline for repeated measures;  $n_2$ , sample size after 1-year of follow-up for repeated measures.

BFM, body fat mass; BMI, body mass index; CAP, controlled attenuation parameter; EMS, enterolignan-predicting microbial score; HC, hip circumference; PBF, percent body fat; VFL, visceral fat level; WC, waist circumference; WHR, waist-to-hip ratio.

**Supplementary Table 1** The characteristics of participants according to urinary enterolignans concentration at baseline and after one-year of follow-up in Huoshan, China <sup>a</sup>

| Characteristics                                | Enterolactone at baseline |                        |                        | Enterodiol at baseline |                       |                        | Enterolactone after one-year of follow-up |                        |                        | Enterodiol after one-year of follow-up |                        |                        |
|------------------------------------------------|---------------------------|------------------------|------------------------|------------------------|-----------------------|------------------------|-------------------------------------------|------------------------|------------------------|----------------------------------------|------------------------|------------------------|
|                                                | Tertile 1                 | Tertile 2              | Tertile 3              | Tertile 1              | Tertile 2             | Tertile 3              | Tertile 1                                 | Tertile 2              | Tertile 3              | Tertile 1                              | Tertile 2              | Tertile 3              |
| No. of participants <sup>b</sup>               | 101                       | 102                    | 102                    | 101                    | 102                   | 102                    | 101                                       | 102                    | 102                    | 101                                    | 102                    | 102                    |
| Age, years                                     | 49.0<br>(37.0-58.0)       | 53.0<br>(39.0-60.0)    | 48.5<br>(34.0-59.0)    | 48.0<br>(37.0-58.0)    | 50.5<br>(34.0-58.0)   | 51.5<br>(38.0-62.0)    | 50.0<br>(37.0-59.0)                       | 50.5<br>(37.0-60.0)    | 52.0<br>(40.0-64.0)    | 49.0<br>(35.0-58.0)                    | 50.5<br>(37.0-60.0)    | 54.0<br>(42.0-64.0)    |
| Female <sup>***</sup> ‡, %                     | 43.6                      | 54.9                   | 65.7                   | 44.6                   | 57.8                  | 61.8                   | 49.5                                      | 51.0                   | 62.8                   | 44.6                                   | 62.8                   | 55.9                   |
| Married, %                                     | 83.2                      | 76.2                   | 88.2                   | 80.2                   | 81.4                  | 86.1                   | 84.0                                      | 79.2                   | 82.4                   | 83.8                                   | 78.4                   | 83.3                   |
| Household per capita income, %                 |                           |                        |                        |                        |                       |                        |                                           |                        |                        |                                        |                        |                        |
| <5000 Yuan                                     | 11.1                      | 21.7                   | 11.2                   | 13.1                   | 11.6                  | 19.0                   | 7.1                                       | 8.3                    | 12.9                   | 6.1                                    | 14.1                   | 8.2                    |
| 5000-10,000 Yuan                               | 24.2                      | 18.6                   | 22.5                   | 26.3                   | 17.9                  | 21.0                   | 13.3                                      | 18.6                   | 12.9                   | 14.1                                   | 13.1                   | 17.4                   |
| 10,000-20,000 Yuan                             | 27.3                      | 19.6                   | 30.6                   | 21.2                   | 29.5                  | 27.0                   | 25.5                                      | 25.8                   | 26.7                   | 28.3                                   | 24.2                   | 25.5                   |
| > 20,000 Yuan                                  | 37.4                      | 40.2                   | 35.7                   | 39.4                   | 41.1                  | 33.0                   | 54.1                                      | 47.4                   | 47.5                   | 51.5                                   | 48.5                   | 49.0                   |
| Education level, %                             |                           |                        |                        |                        |                       |                        |                                           |                        |                        |                                        |                        |                        |
| Informal education,<br>Primary school or below | 11.9                      | 16.7                   | 13.7                   | 10.9                   | 15.7                  | 15.7                   | 5.9                                       | 14.7                   | 17.7                   | 5.9                                    | 15.7                   | 16.7                   |
| Junior high school                             | 29.7                      | 26.5                   | 25.5                   | 25.7                   | 26.5                  | 29.4                   | 26.7                                      | 27.5                   | 23.5                   | 24.8                                   | 26.5                   | 26.5                   |
| Senior high school or above                    | 25.7                      | 23.5                   | 31.4                   | 27.7                   | 24.5                  | 28.4                   | 35.6                                      | 25.5                   | 27.5                   | 29.7                                   | 28.4                   | 30.4                   |
| Never smokers, %                               | 32.7                      | 33.3                   | 29.4                   | 35.6                   | 33.3                  | 26.5                   | 31.7                                      | 32.4                   | 31.4                   | 39.6                                   | 29.4                   | 26.5                   |
| Never drinkers*, %                             | 65.4                      | 70.6                   | 80.2                   | 64.4                   | 74.3                  | 77.5                   | 63.4                                      | 66.7                   | 75.5                   | 62.4                                   | 73.5                   | 69.6                   |
| BMI, kg/m <sup>2</sup>                         | 73.2                      | 84.7                   | 86.9                   | 77.9                   | 80.2                  | 86.7                   | 79.0                                      | 80.2                   | 88.1                   | 80.8                                   | 84.3                   | 82.2                   |
| <18.5 kg/m <sup>2</sup>                        | 2.0                       | 3.9                    | 2.9                    | 1.0                    | 3.9                   | 3.9                    | 6.9                                       | 5.9                    | 4.9                    | 4.0                                    | 8.8                    | 4.9                    |
| 18.5-24.0 kg/m <sup>2</sup>                    | 36.6                      | 45.1                   | 53.9                   | 42.6                   | 43.1                  | 50.0                   | 39.6                                      | 45.1                   | 52.0                   | 42.6                                   | 41.2                   | 52.9                   |
| 24.0-28.0 kg/m <sup>2</sup>                    | 38.6                      | 37.3                   | 27.5                   | 40.6                   | 31.4                  | 31.4                   | 40.6                                      | 32.4                   | 33.3                   | 35.6                                   | 35.3                   | 35.3                   |
| ≥28.0 kg/m <sup>2</sup>                        | 22.8                      | 13.7                   | 15.7                   | 15.8                   | 21.6                  | 14.7                   | 12.9                                      | 16.7                   | 9.8                    | 17.8                                   | 14.7                   | 6.9                    |
| Total energy intake, kcal/d                    | 2180<br>(1701-3051)       | 2235<br>(1676-2696)    | 2002<br>(1665-2660)    | 2180<br>(1690-2954)    | 2081<br>(1590-2569)   | 2169<br>(1684-2822)    | 1905<br>(1557-2528)                       | 2016<br>(1463-2746)    | 1888<br>(1550-2329)    | 1920<br>(1489-2528)                    | 1789<br>(1453-2376)    | 1970<br>(1680-2509)    |
| Physical activities,<br>METS-h/week            | 146.1<br>(112.1-205.6)    | 162.5<br>(109.8-223.2) | 145.5<br>(101.5-218.3) | 156.1<br>(112.1-235.7) | 148.3<br>(93.9-206.1) | 158.7<br>(112.2-218.3) | 156.6<br>(113.5-220.6)                    | 155.1<br>(101.5-237.7) | 170.2<br>(106.6-257.5) | 139.8<br>(104.2-207.9)                 | 156.8<br>(110.7-239.5) | 181.5<br>(109.0-257.5) |
| Hypertension*, %                               | 59.4                      | 46.1                   | 40.2                   | 52.5                   | 52.9                  | 40.2                   | 51.5                                      | 53.9                   | 40.2                   | 48.5                                   | 51.0                   | 45.1                   |
| Type 2 diabetes, %                             | 12.9                      | 12.8                   | 7.8                    | 11.9                   | 10.8                  | 10.8                   | 13.9                                      | 20.6                   | 8.8                    | 16.8                                   | 16.7                   | 9.8                    |
| DASH score‡                                    | 24<br>(22-28)             | 24<br>(22-26)          | 24<br>(22-27)          | 24<br>(22-27)          | 24<br>(22-26)         | 24<br>(22-27)          | 24<br>(21-26)                             | 24<br>(21-26)          | 24<br>(22-27)          | 24<br>(21-26)                          | 23<br>(21-25)          | 25<br>(22-27)          |

Abbreviations: BMI, body mass index; DASH, dietary approaches to stop hypertension; METS, metabolic equivalent tasks.

<sup>a</sup>Continuous variables are expressed as the median (interquartile range) or mean (SD) according to the distribution of the variables, while categorical variables are presented as percentage. *P* values were calculated from the one-way ANOVA or Kruskal-Wallis test for continuous variables and chi-square test or Fisher's exact test for categorical variables.

<sup>b</sup>Numbers of participants vary due to missing values for outcome variables or covariates or to outliers.

Urinary enterolactone at baseline: \**P* value < 0.05, \*\**P* value < 0.01; Urinary enterodiol at baseline: <sup>1</sup>*P* value <0.05; Urinary enterodiol after one-year of follow-up: <sup>‡</sup>*P* value <0.05.

*P* <0.05 indicates significant difference.

**Supplementary Table 2** One-year longitudinal repeated-measures associations between relative abundances of bacterial genera and urinary enterolactone among 485 participants in Huoshan, China

| Phylum; class; order; family; genus                                                                | Prevalence (%) <sup>1</sup> | Average abundance (%) <sup>1</sup> | Prevalence (%) <sup>2</sup> | Average abundance (%) <sup>2</sup> | $\beta$ (SE)  | <i>P</i> value | <i>P</i> <sub>FDR</sub> value |
|----------------------------------------------------------------------------------------------------|-----------------------------|------------------------------------|-----------------------------|------------------------------------|---------------|----------------|-------------------------------|
| Firmicutes; Clostridia; Clostridiales; Ruminococcaceae; <i>Intestinimonas</i>                      | 41.94                       | 0.02                               | ..                          | ..                                 | 96.90 (17.33) | <0.001         | <0.001                        |
| Proteobacteria; Betaproteobacteria; Burkholderiales; Oxalobacteraceae; <i>Oxalobacter</i>          | ..                          | ..                                 | 30.80                       | 0.01                               | 68.14 (15.89) | <0.001         | <0.001                        |
| Actinobacteria; Actinobacteria; Coriobacteriales; Coriobacteriaceae; <i>Adlercreutzia</i>          | 55.24                       | 0.02                               | 50.63                       | 0.02                               | 66.20 (11.50) | <0.001         | <0.001                        |
| Firmicutes; Clostridia; Clostridiales; Peptostreptococcaceae; <i>Mogibacterium</i>                 | ..                          | ..                                 | 29.54                       | 0.02                               | 62.68 (14.60) | <0.001         | <0.001                        |
| Bacteroidetes; Bacteroidia; Bacteroidales; Porphyromonadaceae; <i>Odoribacter</i>                  | 70.97                       | 0.08                               | 64.14                       | 0.04                               | 44.05 (7.39)  | <0.001         | <0.001                        |
| Bacteroidetes; Bacteroidia; Bacteroidales; Porphyromonadaceae; <i>Butyricimonas</i>                | 57.66                       | 0.08                               | 49.37                       | 0.03                               | 42.93 (7.10)  | <0.001         | <0.001                        |
| Actinobacteria; Coriobacteriia; Eggerthellales; Coriobacteriaceae; <i>Gordonibacter</i>            | ..                          | ..                                 | 34.60                       | 0.03                               | 26.74 (10.00) | 0.008          | 0.025                         |
| Firmicutes; Clostridia; Clostridiales; Lachnospiraceae; <i>Eisenbergiella</i>                      | ..                          | ..                                 | 49.79                       | 0.05                               | 20.97 (8.97)  | 0.020          | 0.048                         |
| Bacteroidetes; Bacteroidia; Bacteroidales; Porphyromonadaceae; <i>Coprobacter</i>                  | 16.53                       | 0.02                               | 12.24                       | 0.03                               | 20.45 (8.31)  | 0.015          | 0.037                         |
| Bacteroidetes; Bacteroidia; Bacteroidales; Porphyromonadaceae; <i>Barnesiella</i>                  | 45.56                       | 0.21                               | 42.19                       | 0.11                               | 20.25 (3.77)  | <0.001         | <0.001                        |
| Firmicutes; Clostridia; Clostridiales; Lachnospiraceae; <i>Coproccoccus</i>                        | 75.81                       | 0.19                               | 83.97                       | 0.26                               | 19.26 (3.54)  | <0.001         | <0.001                        |
| Firmicutes; Clostridia; Clostridiales; Ruminococcaceae; <i>Sporobacter</i>                         | 61.29                       | 0.16                               | 63.29                       | 0.49                               | 19.05 (3.03)  | <0.001         | <0.001                        |
| Proteobacteria; Deltaproteobacteria; Desulfovibrionales; Desulfovibrionaceae; <i>Bilophila</i>     | 78.63                       | 0.18                               | 80.17                       | 0.19                               | 15.14 (4.16)  | <0.001         | 0.002                         |
| Firmicutes; Clostridia; Clostridiales; Ruminococcaceae; <i>Subdoligranulum</i>                     | 90.32                       | 0.14                               | 91.56                       | 0.47                               | 14.89 (2.82)  | <0.001         | <0.001                        |
| Firmicutes; Clostridia; Clostridiales; Lachnospiraceae; <i>Dorea</i>                               | 89.52                       | 0.20                               | 86.08                       | 0.13                               | 15.02 (5.57)  | 0.008          | 0.025                         |
| Proteobacteria; Deltaproteobacteria; Desulfovibrionales; Desulfovibrionaceae; <i>Desulfovibrio</i> | 39.11                       | 0.14                               | 44.73                       | 0.32                               | 12.01 (2.95)  | <0.001         | <0.001                        |
| Bacteroidetes; Bacteroidia; Bacteroidales; Rikenellaceae; <i>Alistipes</i>                         | 85.48                       | 0.98                               | 84.81                       | 0.54                               | 11.90 (1.94)  | <0.001         | <0.001                        |
| Firmicutes; Clostridia; Clostridiales; Ruminococcaceae; <i>Oscillibacter</i>                       | 90.73                       | 0.36                               | 91.14                       | 0.71                               | 11.26 (2.04)  | <0.001         | <0.001                        |
| Firmicutes; Clostridia; Clostridiales; Ruminococcaceae; <i>Clostridium_IV</i>                      | 90.32                       | 0.07                               | 92.83                       | 0.17                               | 10.88 (4.66)  | 0.020          | 0.048                         |
| Firmicutes; Clostridia; Clostridiales; Ruminococcaceae; <i>Ruminococcus</i>                        | 84.68                       | 1.23                               | 84.39                       | 1.28                               | 9.21 (1.47)   | <0.001         | <0.001                        |
| Firmicutes; Clostridia; Clostridiales; Eubacteriaceae; <i>Eubacterium</i>                          | 62.50                       | 0.25                               | 67.09                       | 0.90                               | 8.86 (1.79)   | <0.001         | <0.001                        |
| Bacteroidetes; Bacteroidia; Bacteroidales; Prevotellaceae; <i>Paraprevotella</i>                   | 37.50                       | 0.30                               | 35.44                       | 0.25                               | 8.93 (2.79)   | 0.002          | 0.006                         |
| Actinobacteria; Actinobacteria; Coriobacteriales; Coriobacteriaceae; <i>Collinsella</i>            | 63.31                       | 0.21                               | 68.78                       | 0.43                               | 7.20 (2.51)   | 0.005          | 0.016                         |
| Firmicutes; Clostridia; Clostridiales; Ruminococcaceae; <i>Faecalibacterium</i>                    | 100.00                      | 7.71                               | 98.73                       | 8.98                               | 4.13 (0.75)   | <0.001         | 0.001                         |
| Firmicutes; Negativicutes; Selenomonadales; Acidaminococcaceae; <i>Phascolarctobacterium</i>       | 84.68                       | 2.62                               | 91.56                       | 2.49                               | 3.11 (1.12)   | 0.006          | 0.020                         |
| Firmicutes; Clostridia; Clostridiales; Ruminococcaceae; <i>Gemmiger</i>                            | 83.06                       | 0.82                               | 87.34                       | 3.05                               | 2.73 (1.03)   | 0.009          | 0.026                         |

Abbreviations: FDR, false discovery rate.

*P* values were estimated from a linear mixed-effects model with repeated measures after adjustment for age (18-29, 30-39, 40-49, 50-59, and  $\geq 60$  years), sex (women, men), education level (informal education, primary school or below, junior high school, and senior high school or above), household per capita income (<5000, 5000-10,000, 10,000-20,000, and >20,000 yuan), total energy intake (kcal/day, continuous), physical activity (metabolic equivalent tasks-h/week, continuous), current or past smoking (yes, no), current or past alcohol drinking (yes, no), batch effect. All taxa with false discovery rate-adjusted  $P_{FDR} < 0.05$  are included in the table.

**Supplementary Table 3** One-year longitudinal repeated-measures associations between relative abundances of bacterial genera and urinary enterodiol among 485 participants

in Huoshan, China

| Phylum; class; order; family; genus                                                                | Prevalence (%) <sup>1</sup> | Average abundance (%) <sup>1</sup> | Prevalence (%) <sup>2</sup> | Average abundance (%) <sup>2</sup> | $\beta$ (SE)  | <i>P</i> value | <i>P</i> <sub>FDR</sub> value |
|----------------------------------------------------------------------------------------------------|-----------------------------|------------------------------------|-----------------------------|------------------------------------|---------------|----------------|-------------------------------|
| Firmicutes; Clostridia; Clostridiales; Ruminococcaceae; <i>Intestinimonas</i>                      | 41.94                       | 0.02                               | ..                          | ..                                 | 80.32 (17.67) | <0.001         | <0.001                        |
| Actinobacteria; Actinobacteria; Coriobacteriales; Coriobacteriaceae; <i>Adlercreutzia</i>          | 55.24                       | 0.02                               | 50.63                       | 0.02                               | 60.35 (12.58) | <0.001         | <0.001                        |
| Firmicutes; Clostridia; Clostridiales; Peptostreptococcaceae; <i>Mogibacterium</i>                 | ..                          | ..                                 | 29.54                       | 0.02                               | 47.83 (15.17) | 0.002          | 0.009                         |
| Bacteroidetes; Bacteroidia; Bacteroidales; Porphyromonadaceae; <i>Odoribacter</i>                  | 70.97                       | 0.08                               | 64.14                       | 0.04                               | 41.27 (7.93)  | <0.001         | <0.001                        |
| Bacteroidetes; Bacteroidia; Bacteroidales; Porphyromonadaceae; <i>Butyricimonas</i>                | 57.66                       | 0.08                               | 49.37                       | 0.03                               | 39.07 (7.51)  | <0.001         | <0.001                        |
| Bacteroidetes; Bacteroidia; Bacteroidales; Porphyromonadaceae; <i>Barnesiella</i>                  | 45.56                       | 0.21                               | 42.19                       | 0.11                               | 19.55 (4.06)  | <0.001         | <0.001                        |
| Proteobacteria; Deltaproteobacteria; Desulfovibrionales; Desulfovibrionaceae; <i>Bilophila</i>     | 78.63                       | 0.18                               | 80.17                       | 0.19                               | 18.71 (4.52)  | <0.001         | <0.001                        |
| Firmicutes; Clostridia; Clostridiales; Lachnospiraceae; <i>Dorea</i>                               | 89.52                       | 0.20                               | 86.08                       | 0.13                               | 17.64 (6.09)  | 0.004          | 0.017                         |
| Firmicutes; Clostridia; Clostridiales; Ruminococcaceae; <i>Sporobacter</i>                         | 61.29                       | 0.16                               | 63.29                       | 0.49                               | 16.70 (3.35)  | <0.001         | <0.001                        |
| Firmicutes; Clostridia; Clostridiales; Lachnospiraceae; <i>Coproccoccus</i>                        | 75.81                       | 0.19                               | 83.97                       | 0.26                               | 14.43 (3.91)  | <0.001         | 0.002                         |
| Actinobacteria; Actinobacteria; Coriobacteriales; Coriobacteriaceae; <i>Collinsella</i>            | 63.31                       | 0.21                               | 68.78                       | 0.43                               | 10.80 (2.76)  | <0.001         | 0.001                         |
| Bacteroidetes; Bacteroidia; Bacteroidales; Rikenellaceae; <i>Alistipes</i>                         | 85.48                       | 0.98                               | 84.81                       | 0.54                               | 12.34 (2.10)  | <0.001         | <0.001                        |
| Proteobacteria; Deltaproteobacteria; Desulfovibrionales; Desulfovibrionaceae; <i>Desulfovibrio</i> | 39.11                       | 0.14                               | 44.73                       | 0.32                               | 10.62 (3.21)  | 0.001          | 0.006                         |
| Firmicutes; Clostridia; Clostridiales; Ruminococcaceae; <i>Oscillibacter</i>                       | 90.73                       | 0.36                               | 91.14                       | 0.71                               | 10.30 (2.31)  | <0.001         | <0.001                        |
| Firmicutes; Clostridia; Clostridiales; Ruminococcaceae; <i>Subdoligranulum</i>                     | 90.32                       | 0.14                               | 91.56                       | 0.47                               | 9.52 (3.24)   | 0.004          | 0.016                         |
| Firmicutes; Clostridia; Clostridiales; Lachnospiraceae; <i>Ruminococcus2</i>                       | 98.39                       | 0.65                               | 95.78                       | 0.68                               | 7.96 (2.80)   | 0.005          | 0.019                         |
| Bacteroidetes; Bacteroidia; Bacteroidales; Prevotellaceae; <i>Paraprevotella</i>                   | 37.50                       | 0.30                               | 35.44                       | 0.25                               | 7.84 (3.00)   | 0.009          | 0.034                         |
| Firmicutes; Clostridia; Clostridiales; Ruminococcaceae; <i>Ruminococcus</i>                        | 84.68                       | 1.23                               | 84.39                       | 1.28                               | 7.87 (1.64)   | <0.001         | <0.001                        |
| Firmicutes; Clostridia; Clostridiales; Eubacteriaceae; <i>Eubacterium</i>                          | 62.50                       | 0.25                               | 67.09                       | 0.90                               | 6.14 (2.06)   | 0.003          | 0.014                         |
| Firmicutes; Clostridia; Clostridiales; Lachnospiraceae; <i>Roseburia</i>                           | 99.19                       | 4.83                               | 99.16                       | 3.05                               | 3.61 (1.13)   | 0.002          | 0.009                         |
| Firmicutes; Clostridia; Clostridiales; Ruminococcaceae; <i>Faecalibacterium</i>                    | 100.00                      | 7.71                               | 98.73                       | 8.98                               | 3.24 (0.84)   | <0.001         | 0.001                         |
| Bacteroidetes; Bacteroidia; Bacteroidales; Prevotellaceae; <i>Prevotella</i>                       | 89.52                       | 13.99                              | 81.01                       | 10.64                              | 1.23 (0.43)   | 0.004          | 0.017                         |



Abbreviations: FDR, false discovery rate.

*P* values were estimated from a linear mixed-effects model with repeated measures after adjustment for age (18-29, 30-39, 40-49, 50-59, and  $\geq 60$  years), sex (women, men), education level (informal education, primary school or below, junior high school, and senior high school or above), household per capita income (<5000, 5000-10,000, 10,000-20,000, and >20,000 yuan), total energy intake (kcal/day, continuous), physical activity (metabolic equivalent tasks-h/week, continuous), current or past smoking (yes, no), current or past alcohol drinking (yes, no), batch effect. All taxa with false discovery rate-adjusted  $P_{FDR} < 0.05$  are included in the table.

**Supplementary Table 4** Cross-sectional associations between urinary enterolignans and body fat measures at baseline and after 1-year among community-dwelling adults in Huoshan, China <sup>a, b</sup>

| Body fat measures                                    | Urinary enterolignans at baseline |          | Urinary enterolignans after 1-year |          |
|------------------------------------------------------|-----------------------------------|----------|------------------------------------|----------|
|                                                      | $\beta$ (SE)                      | <i>P</i> | $\beta$ (SE)                       | <i>P</i> |
| WC<br>(N <sub>1</sub> =305; N <sub>2</sub> =305)     | -0.0093(0.0027)                   | 0.001    | -0.0080(0.0036)                    | 0.026    |
| HC<br>(N <sub>1</sub> =305; N <sub>2</sub> =304)     | -0.0027(0.0020)                   | 0.173    | -0.0064(0.0025)                    | 0.011    |
| WHR<br>(N <sub>1</sub> =305; N <sub>2</sub> =304)    | -0.0065(0.0019)                   | 0.001    | -0.0014(0.0025)                    | 0.561    |
| Weight<br>(N <sub>1</sub> =305; N <sub>2</sub> =305) | -0.0101(0.0037)                   | 0.007    | -0.0122(0.0048)                    | 0.011    |
| BMI<br>(N <sub>1</sub> =305; N <sub>2</sub> =305)    | -0.0102(0.0034)                   | 0.003    | -0.0112(0.0043)                    | 0.010    |
| BFM<br>(N <sub>1</sub> =298; N <sub>2</sub> =298)    | -0.0241(0.0092)                   | 0.009    | -0.0332(0.0113)                    | 0.004    |
| PBF<br>(N <sub>1</sub> =298; N <sub>2</sub> =298)    | -0.0132(0.0062)                   | 0.035    | -0.0193(0.0076)                    | 0.011    |
| VFL<br>(N <sub>1</sub> =298; N <sub>2</sub> =298)    | -0.0275(0.0113)                   | 0.016    | -0.0381(0.0137)                    | 0.006    |
| CAP<br>(N <sub>1</sub> =303; N <sub>2</sub> =303)    | -0.0161(0.0046)                   | 0.001    | -0.0194(0.0056)                    | 0.001    |

Abbreviations: BFM, body fat mass; BMI, body mass index; CAP, controlled attenuation parameter; DASH, dietary approaches to stop hypertension; HC, hip circumference; PBF, percent body fat; VFL, visceral fat level; WC, waist circumference; WHR, waist-to-hip ratio.

<sup>a</sup> Linear regression models were adjusted for age (18-29, 30-39, 40-49, 50-59, and  $\geq 60$  years), sex (women, men), education level (informal education, primary school or below, junior high school, and senior high school or above), household per capita income (<5000, 5000-10,000, 10,000-20,000, and >20,000 yuan), total energy intake (kcal/day, continuous), physical activity (metabolic equivalent tasks-h/week, continuous), menopausal status (yes, no), current or past smoking (yes, no), current or past

alcohol drinking (yes, no), and DASH diet index (continuous).

<sup>b</sup>The sample size depended on the availability of data on urinary enterolignans and obesity markers.  $N_1$ , sample size at baseline,  $N_2$ , sample size after 1-year.

$P < 0.05$  indicates significant difference.

**Supplementary Table 5** Cross-sectional associations between enterolignan-predicting microbial score and body fat measures at baseline and after 1-year among community-dwelling adults in Huoshan, China <sup>a, b</sup>

| Body fat measures                                    | Enterolignan-predicting microbial score at baseline |          | Enterolignan-predicting microbial score after 1-year |          |
|------------------------------------------------------|-----------------------------------------------------|----------|------------------------------------------------------|----------|
|                                                      | $\beta$ (SE)                                        | <i>P</i> | $\beta$ (SE)                                         | <i>P</i> |
| WC<br>(N <sub>1</sub> =248; N <sub>2</sub> =237)     | 0.0216(0.0146)                                      | 0.141    | 0.0223(0.0153)                                       | 0.146    |
| HC<br>(N <sub>1</sub> =248; N <sub>2</sub> =237)     | 0.0116(0.0111)                                      | 0.300    | 0.0078(0.0097)                                       | 0.424    |
| WHR<br>(N <sub>1</sub> =248; N <sub>2</sub> =237)    | 0.0100(0.0106)                                      | 0.345    | 0.0141(0.0091)                                       | 0.123    |
| Weight<br>(N <sub>1</sub> =248; N <sub>2</sub> =237) | 0.0251(0.0197)                                      | 0.204    | 0.0036(0.0212)                                       | 0.863    |
| BMI<br>(N <sub>1</sub> =248; N <sub>2</sub> =237)    | 0.0281(0.0187)                                      | 0.134    | 0.0181(0.0193)                                       | 0.349    |
| BFM<br>(N <sub>1</sub> =243; N <sub>2</sub> =232)    | -0.0749(0.0502)                                     | 0.137    | -0.0265(0.0511)                                      | 0.605    |
| PBF<br>(N <sub>1</sub> =243; N <sub>2</sub> =232)    | -0.0373(0.0349)                                     | 0.286    | -0.0166(0.0347)                                      | 0.633    |
| VFL<br>(N <sub>1</sub> =243; N <sub>2</sub> =232)    | -0.0847(0.0619)                                     | 0.173    | -0.0416(0.0618)                                      | 0.501    |
| CAP<br>(N <sub>1</sub> =246; N <sub>2</sub> =235)    | -0.0776(0.0241)                                     | 0.001    | -0.0535(0.0237)                                      | 0.025    |

Abbreviations: BFM, body fat mass; BMI, body mass index; CAP, controlled attenuation parameter; PBF, percent body fat; VFL, visceral fat level; WHR, waist-to-hip ratio.

<sup>a</sup> Linear regression models were adjusted for age (18-29, 30-39, 40-49, 50-59, and  $\geq 60$  years), sex (women, men), education level (informal education, primary school or below, junior high school, and senior high school or above), household per capita income (<5000, 5000-10,000, 10,000-20,000, and >20,000 yuan), total energy intake (kcal/day, continuous), physical activity (metabolic equivalent tasks-h/week, continuous), current or past smoking (yes, no), and current or past alcohol drinking (yes, no).

<sup>b</sup>The sample size depended on the availability of data on urinary enterolignans, gut microbiota, and obesity markers. N<sub>1</sub>, sample size at baseline, N<sub>2</sub>, sample size after 1-year.

*P*<0.05 indicates significant difference.
